# Supplementary material for: Photofunctional Eu3+/Tb3+ hybrids through sulfoxide linkages: coordination bonds construction, characterization and luminescence
Source: Royal Society of Chemistry journal article supplement (doi:10.1039/c0dt01793k), 2011-01-01
Supplement: c0dt01793k.pdf [file c0dt01793k.pdf]

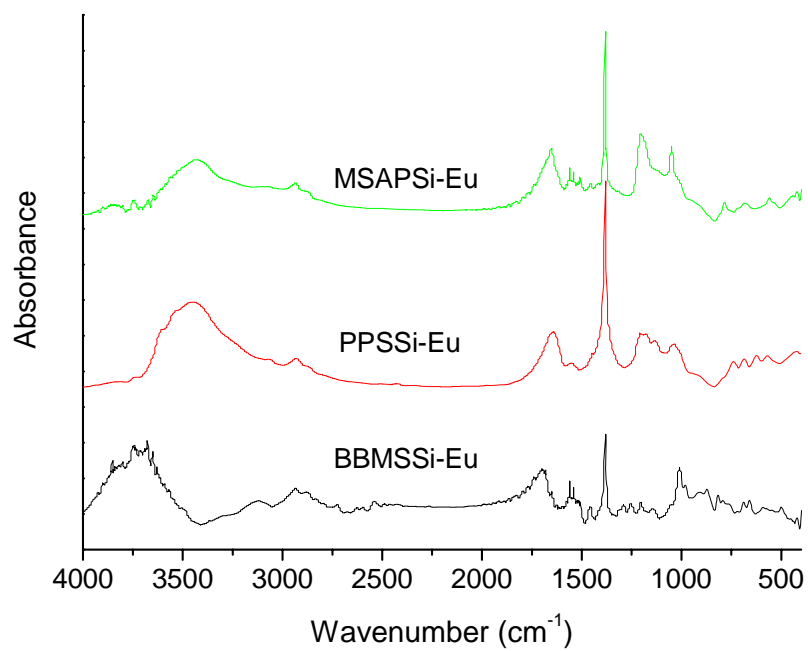

**Figure S1** Infrared spectra of europium hybrid materials.

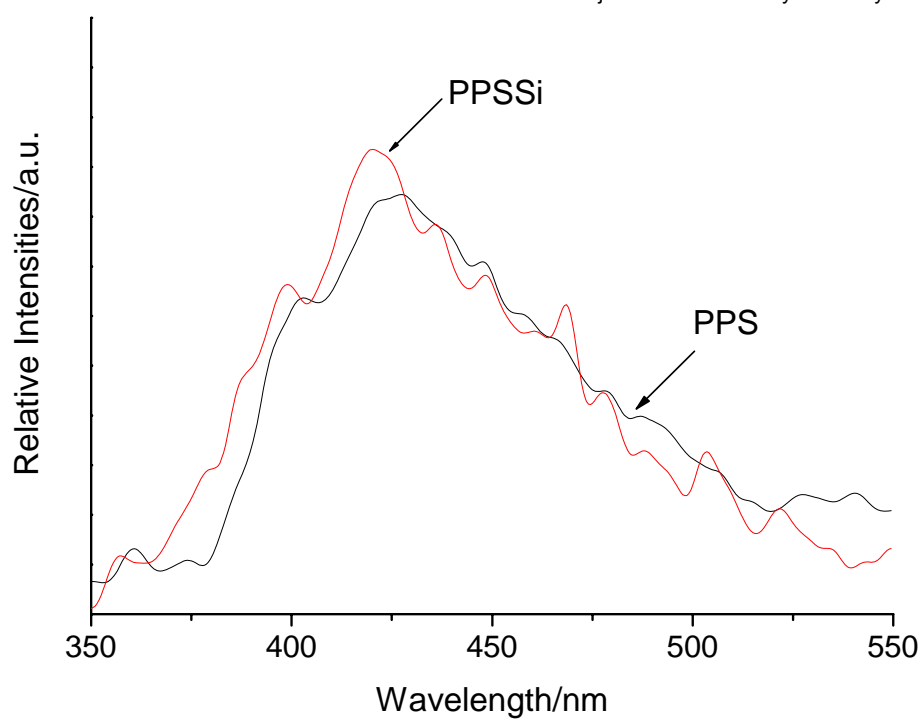

**Figure S2** Phosphorescence spectra of PPS and the precursor PPSSi.

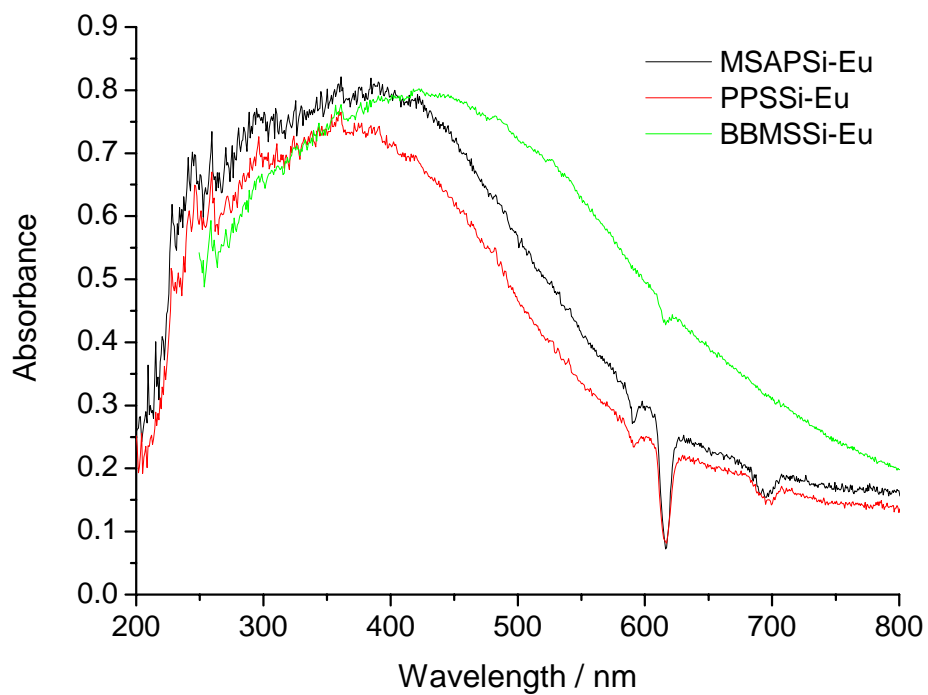

**Figure S3** Ultraviolet-visible diffuse reflection absorption spectra of the europium hybrid materials.

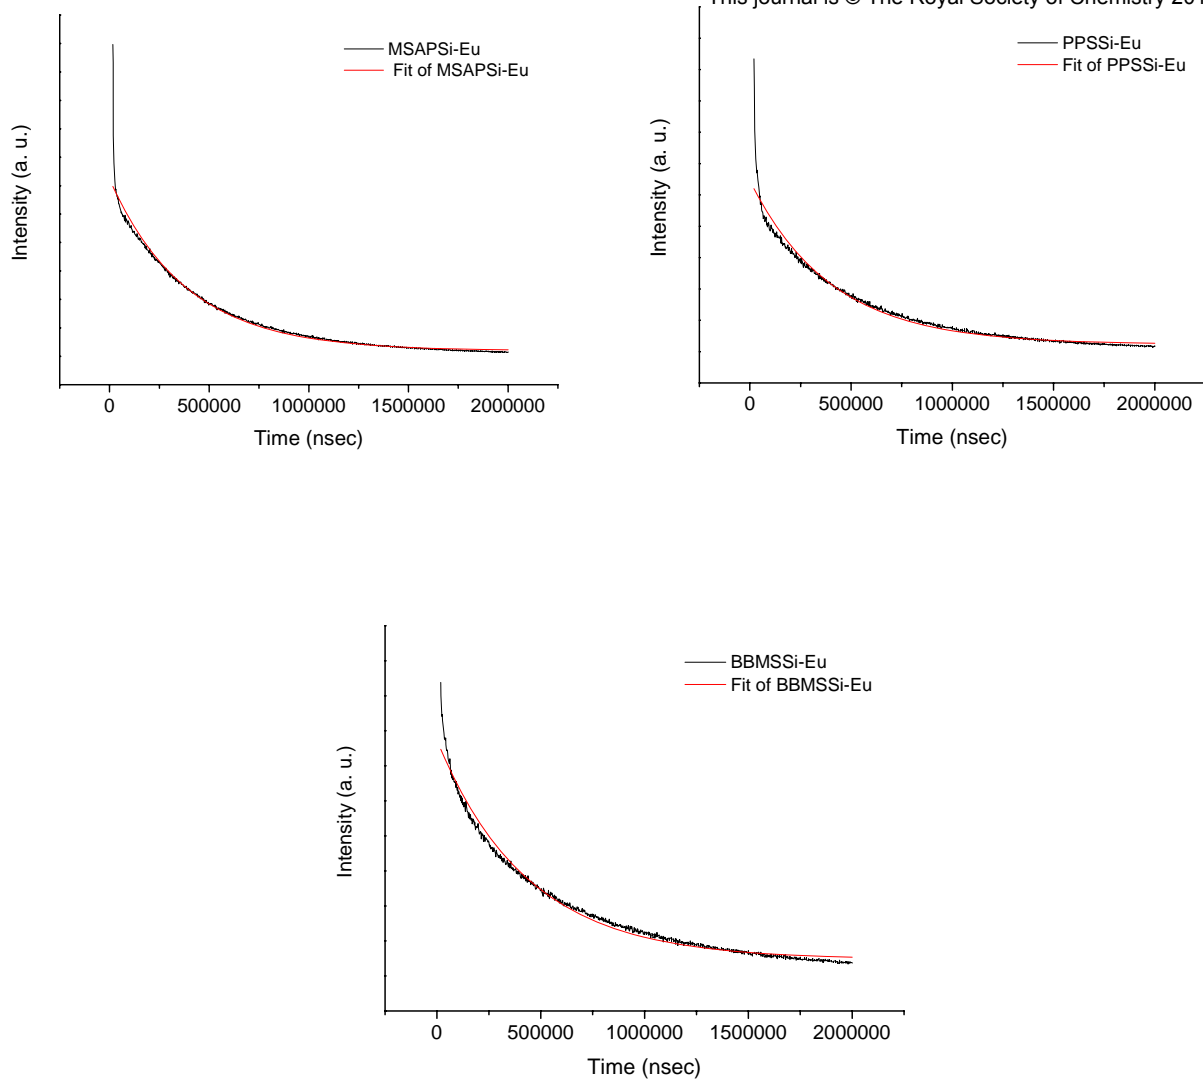

**Figure S4** The emission decay curves and the fit curves of the europium hybrid materials.

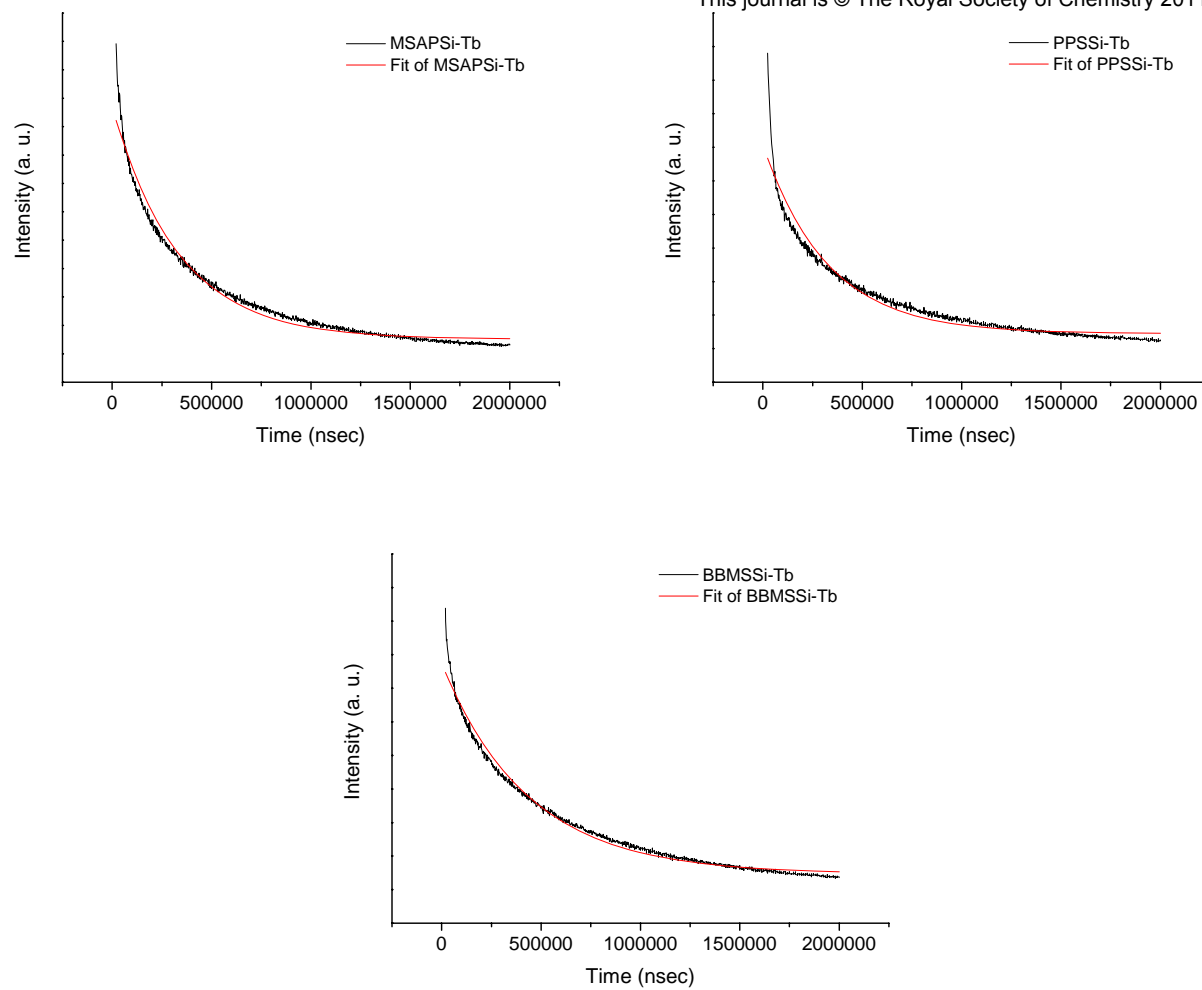

**Figure S5** The emission decay curves and the fit curves of the terbium hybrid materials.

| Assignment<br>(cm <sup>-1</sup> ) | v <sub>S=O</sub> | v <sub>C=O</sub> | v <sub>C-H(CH<sub>2</sub>)</sub> | v <sub>N-H</sub> | v <sub>Si-C</sub> | v <sub>Si-O</sub> |
|-----------------------------------|------------------|------------------|----------------------------------|------------------|-------------------|-------------------|
| MSAP                              | 1029             | 1672             | 2941                             |                  |                   |                   |
| MSAPSi                            |                  | 1663             | 2974, 2927, 2887                 | 3348             | 1197              |                   |
| MSAPSi-Eu                         |                  | 1647             | 2932, 2864                       |                  | 1205              | 1050              |
| PPS                               | 1053             | 1669             | 2963                             |                  |                   |                   |
| PPSSi                             |                  | 1652             | 2968, 2882                       | 3332             | 1182              |                   |
| PPSSi-Eu                          |                  | 1636             | 2928, 2861                       |                  | 1201              | 1040              |
| BBMS                              | 1039             | 1690             | 2952                             |                  |                   |                   |
| BBMSSi                            |                  | 1684             | 2975, 2928, 2887                 | 3339             | 1192              |                   |
| BBMSSi-Eu                         |                  | 1670             | 2933, 2874                       |                  | 1206              | 1039              |

**Table S2** Triple state energies of organic ligands and their energy transfer with rare earth ions

Electronic Supplementary Information for Dalton Transactions  
This journal is © The Royal Society of Chemistry 2011

|        | Triplet state energies (cm <sup>-1</sup> ) | $\Delta E(\text{Tr-Eu}^{3+})$ (cm <sup>-1</sup> ) | $\Delta E(\text{Tr-Tb}^{3+})$ (cm <sup>-1</sup> ) |
|--------|--------------------------------------------|---------------------------------------------------|---------------------------------------------------|
| MSAP   | 22727                                      | 5462                                              | 2227                                              |
| MSAPSi | 23095                                      | 5830                                              | 2595                                              |
| PPS    | 23364                                      | 5099                                              | 2864                                              |
| PPSSi  | 23866                                      | 6601                                              | 3366                                              |
| BBMS   | 21053 <sup>[23]</sup>                      | 3812                                              | 553                                               |
| BBMSSi | 21476                                      | 4211                                              | 976                                               |
